# Supplementary material
Source: HighWire-hosted journal article supplement (https://jnis.bmj.com/content/neurintsurg-2020-016043)

**A1: Average aneurysm dimensions, RSC diameters, and aorta diameters, for the 90- and 180-day cohorts treated with Flex and Vantage. All dimensions are mean  $\pm$  standard deviation (SD).**

| Device  | Study Duration (days) | Aneurysm Height (mm) | Aneurysm Width (mm) | Aneurysm Neck (mm) | RSC diameter (mm) |
|---------|-----------------------|----------------------|---------------------|--------------------|-------------------|
| Flex    | 90 $\pm$ 2            | 6.92 $\pm$ 1.28      | 3.46 $\pm$ 0.56     | 3.96 $\pm$ 1.92    | 3.30 $\pm$ 0.25   |
| Vantage | 90 $\pm$ 2            | 7.12 $\pm$ 2.15      | 3.22 $\pm$ 0.59     | 3.29 $\pm$ 1.08    | 3.12 $\pm$ 0.29   |
| Flex    | 180 $\pm$ 2           | 6.39 $\pm$ 1.72      | 2.82 $\pm$ 0.43     | 3.57 $\pm$ 1.73    | 3.28 $\pm$ 0.44   |
| Vantage | 180 $\pm$ 2           | 5.34 $\pm$ 1.13      | 2.66 $\pm$ 0.40     | 2.85 $\pm$ 1.04    | 3.00 $\pm$ 0.39   |

| Device  | Study Duration (days) | Aorta diameter (mm) |
|---------|-----------------------|---------------------|
| Flex    | 90 $\pm$ 2            | 3.08 $\pm$ 0.30     |
| Vantage | 90 $\pm$ 2            | 2.86 $\pm$ 0.25     |
| Flex    | 180 $\pm$ 2           | 3.18 $\pm$ 0.28     |
| Vantage | 180 $\pm$ 2           | 3.27 $\pm$ 0.21     |

**A2: Histopathology attributes and grading scale for the tissue sections from Flex and Vantage implanted vessels for 90- and 180- day cohorts. Grading was performed by an independent pathologist blinded to device.**

#### **Luminal/Mural Thrombus**

Grade 0: No luminal thrombus

Grade 1 (Minimal): Occupies ~ <5% of the lumen area

Grade 2 (Mild): Occupies ~5-35% of the lumen area

Grade 3 (Moderate): Occupies ~ 35-70% of the lumen area

Grade 4 (Marked/Severe): Occupies ~ >70% of the lumen area

#### **Endothelial Cell Coverage**

Grade 0 (Absent): ~ <5% of the luminal surface covered

Grade 1 (Minimal): ~ 5-25% of the luminal surface covered

Grade 2 (Mild): ~ 25-50% of the luminal surface covered

Grade 3 (Moderate): ~ 50-90% of the luminal surface covered

Grade 4 (Complete): ~ >90% of the luminal surface covered

#### **Inflammation** (neointimal, medial, and adventitial)

Grade 0: No inflammatory response

Grade 1: Minimal response

Grade 2: Mild response

Grade 3: Moderate response

Grade 4: Marked/Severe response

#### **Fibrin**

Grade 0: Not present

Grade 1: Minimal

Grade 2: Mild

Grade 3: Moderate

Grade 4: Marked/Severe

#### **Medial Smooth Muscle Cell (SMC) Loss**

Grade 0: No medial SMC loss

Grade 1: Minimal ~ <5% medial SMC loss

Grade 2: Mild ~ 5-25% medial SMC loss

Grade 3: Moderate ~ 25-50% medial SMC loss

Grade 4: Marked/Severe ~>50% medial SMC loss

#### **Disruption of the Internal Elastic Lamina (IEL) and External Elastic Lamina (EEL)**

Grade 0: No disruption

Grade 1: Minimal ~ <5% disruption

Grade 2: Mild ~ 5-25% disruption

Grade 3: Moderate ~ 25-50% disruption

Grade 4: Marked/Severe ~ >50% disruption

**Adventitia**

Grade 0: No changes present

Grade 1: Minimal ~<5% affected

Grade 2: Mild ~5-25% affected

Grade 3: Moderate ~26-50% affected

Grade 4: Marked/Severe ~>50% affected

**A3: Raymond Roy Occlusion Classification (RROC) for the 90- and 180-day cohorts treated with Flex and Vantage devices.**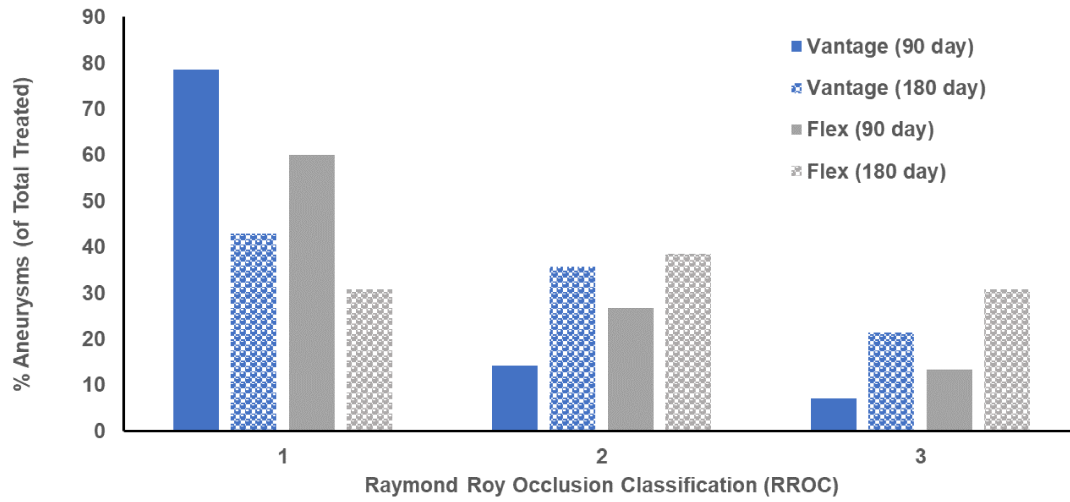

Supplement: inline-supplementary-material-1 [file inline-supplementary-material-1.pdf]
